# Supplementary material for: Modeling the Circadian Control of the Cell Cycle and Its Consequences for Cancer Chronotherapy
Source: MDPI journal article supplement (doi:10.3390/biology12040612), 2023-04-18
Supplement: s1 [file s1]

Supplementary information

# Modeling the circadian control of the cell cycle and its consequences for cancer chronotherapy

Courtney Leung, Claude Gérard and Didier Gonze

Table S1. Parameters values.

| Symbol        | Definition                                                                                                               | Value                                 |
|---------------|--------------------------------------------------------------------------------------------------------------------------|---------------------------------------|
| $Cdc20_{tot}$ | Total concentration of protein Cdc20                                                                                     | $1 \mu\text{M}$                       |
| $E2F_{tot}$   | Total concentration of transcription factor E2F                                                                          | $1 \mu\text{M}$                       |
| $GF$          | Growth factor                                                                                                            | $1 \mu\text{M}$                       |
| $Me_{tot}$    | Total concentration of cyclin E/Cdk2                                                                                     | $1 \mu\text{M}$                       |
| $Ma_{tot}$    | Total concentration of cyclin A/Cdk1                                                                                     | $1 \mu\text{M}$                       |
| $Mb_{tot}$    | Total concentration of cyclin B/Cdk1                                                                                     | $1 \mu\text{M}$                       |
| $K_{ib}$      | Inhibition constant for Wee1 inactivation by cyclin B/Cdk1                                                               | $0.5 \mu\text{M}$                     |
| $V_{sd}$      | Maximum rate of synthesis of cyclin D/Cdk4-6 induced by growth factor                                                    | $0.175 \mu\text{M}\cdot\text{h}^{-1}$ |
| $K_{gf}$      | Michaelis constant for synthesis of cyclin D/Cdk4-6 complex induced by growth factor                                     | $0.1 \mu\text{M}$                     |
| $V_{dd}$      | Maximum degradation rate of cyclin D/Cdk4-6 complex                                                                      | $0.245 \mu\text{M}\cdot\text{h}^{-1}$ |
| $K_{dd}$      | Michaelis constant for degradation of cyclin D/Cdk4-6 complex                                                            | $0.1 \mu\text{M}$                     |
| $V_{1e2f}$    | Rate constant for activation of E2F by cyclin D/Cdk4-6 and cyclin E/Cdk2 complexes                                       | $0.4 \text{h}^{-1}$                   |
| $K_{1e2f}$    | Michaelis constant for E2F activation by cyclin D/Cdk4-6 and cyclin E/Cdk2 complexes                                     | $0.005 \mu\text{M}$                   |
| $V_{2e2f}$    | Rate constant for inactivation of E2F by cyclin A/Cdk2 complex                                                           | $0.7 \text{h}^{-1}$                   |
| $K_{2e2f}$    | Michaelis constant for E2F inactivation by cyclin A/Cdk2 complex                                                         | $0.005 \mu\text{M}$                   |
| $V_{1Me}$     | Rate for activation of cyclin E/Cdk2 by E2F                                                                              | $1.1 \mu\text{M}\cdot\text{h}^{-1}$   |
| $K_{1Me}$     | Michaelis constant for cyclin E/Cdk2 activation by E2F                                                                   | $0.005 \mu\text{M}$                   |
| $V_{2Me}$     | Rate constant for inactivation of cyclin E/Cdk2 by cyclin A/Cdk2                                                         | $1.6 \text{h}^{-1}$                   |
| $K_{2Me}$     | Michaelis constant for cyclin E/Cdk2 inactivation by cyclin A/Cdk2                                                       | $0.005 \mu\text{M}$                   |
| $V_{1Ma}$     | Rate constant for activation of cyclin A/Cdk2 by E2F                                                                     | $0.6 \text{h}^{-1}$                   |
| $K_{1Ma}$     | Michaelis constant for cyclin A/Cdk2 activation by E2F                                                                   | $0.005 \mu\text{M}$                   |
| $V_{2Ma}$     | Rate constant for inactivation of cyclin A/Cdk2 by Cdc20                                                                 | $0.6 \text{h}^{-1}$                   |
| $K_{2Ma}$     | Michaelis constant for cyclin A/Cdk2 inactivation by Cdc20                                                               | $0.005 \mu\text{M}$                   |
| $V_{1Mb}$     | Rate for activation of cyclin B/Cdk1 by cyclin A/Cdk2                                                                    | $1 \mu\text{M}\cdot\text{h}^{-1}$     |
| $K_{1Mb}$     | Michaelis constant for cyclin B/Cdk1 activation by cyclin A/Cdk2                                                         | $0.005 \mu\text{M}$                   |
| $V_{2Mb}$     | Rate for inactivation of cyclin B/Cdk1 by Cdc20                                                                          | $0.8 \text{h}^{-1}$                   |
| $K_{2Mb}$     | Michaelis constant for cyclin B/Cdk1 inactivation by Cdc20                                                               | $0.005 \mu\text{M}$                   |
| $V_{1cdc20}$  | Rate constant for activation of Cdc20 through phosphorylation by cyclin B/Cdk1                                           | $1.8 \text{h}^{-1}$                   |
| $K_{1cdc20}$  | Michaelis constant for Cdc20 activation through phosphorylation by cyclin B/Cdk1                                         | $0.005 \mu\text{M}$                   |
| $V_{2cdc20}$  | Rate of inactivation of Cdc20 through dephosphorylation                                                                  | $0.6 \mu\text{M}\cdot\text{h}^{-1}$   |
| $K_{2cdc20}$  | Michaelis constant for Cdc20 inactivation through dephosphorylation                                                      | $0.005 \mu\text{M}$                   |
| $K_{ie}$      | Michaelis constant for cyclin B/Cdk1 inactivation by cyclin E/Cdk2                                                       | $0.2 \mu\text{M}$                     |
| $a_1$         | Basal term for activation of cyclin E/Cdk2                                                                               | 1                                     |
| $a_2$         | Basal term for activation of cyclin B/Cdk1                                                                               | 1                                     |
| $a_3$         | Basal term for inactivation of cyclin B/Cdk1                                                                             | 1                                     |
| $b_1$         | Term representing self-activation of cyclin E/Cdk2 through mutual activation between cyclin E/Cdk2 and phosphatase Cdc25 | 1                                     |
| $b_2$         | Term representing self-activation of cyclin B/Cdk1 through mutual activation between cyclin B/Cdk1 and phosphatase Cdc25 | 1                                     |
| $b_3$         | Term representing deactivation of cyclin B/Cdk1 enhanced by Wee1                                                         | 20                                    |

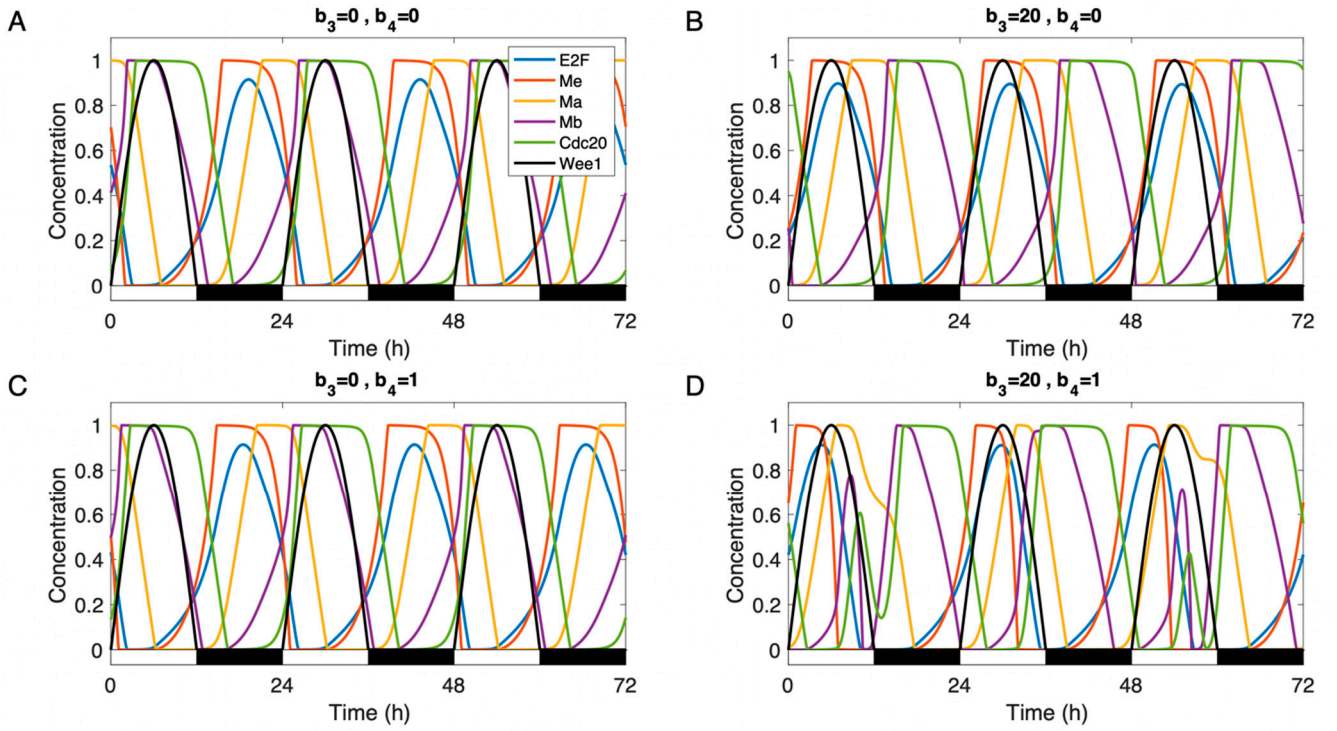

**Figure S1.** Dynamics of the cell cycle network (A) in absence of circadian signal, and (B-D) in presence of a circadian signal (Wee1). Three coupling scenarios are considered: Wee1 acting only on cyclin B/Cdk1 (B), only on cyclin E/Cdk2 (C), or both on cyclin B/Cdk1 and on cyclin E/Cdk2 (D). To account for the effect of Wee1 on Cyclin E/Cdk2, the term  $V_{2Me}$  in Eq. (3) has been replaced by  $V_{2Me}(a_4 + b_4 \cdot Wee1)$  with  $a_4 = 1$ . The values of  $b_3$  and  $b_4$ , which quantify the strength of circadian coupling, are indicated on the top of each panel. Note that the results are not qualitatively changed if we would take  $b_4 = 20$  (not shown).

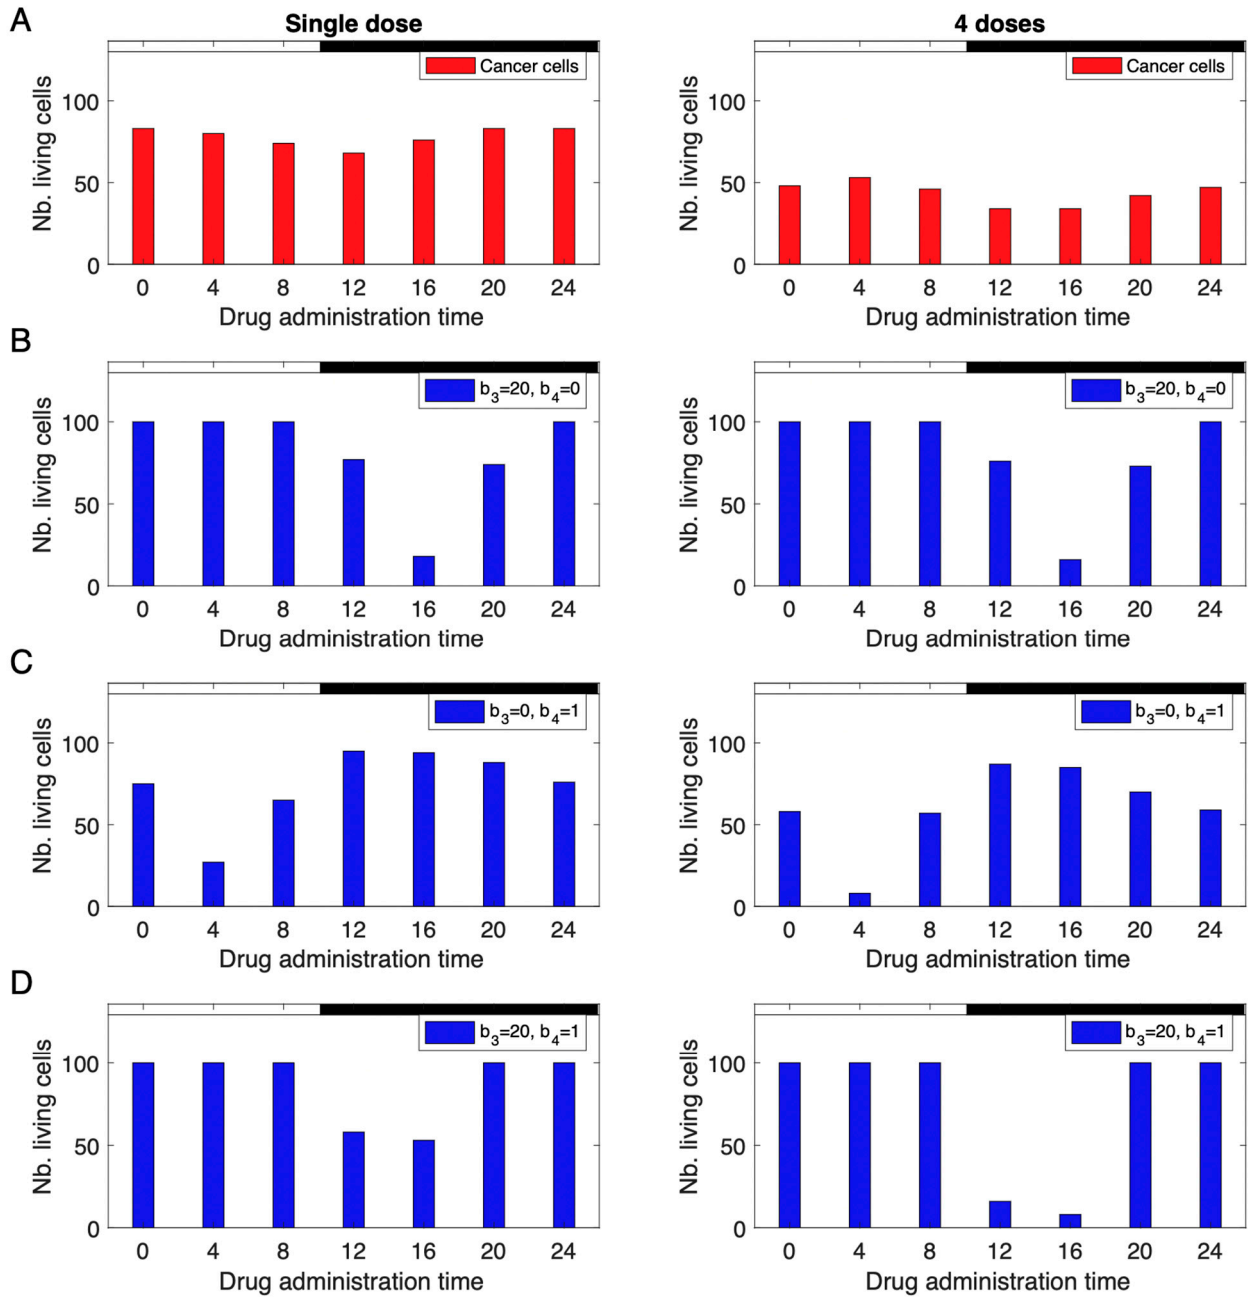

**Figure S2.** Effect of the schedule of the treatment. The different histograms give the number of living entrained/healthy (blue) vs non-entrained/cancer cells (red) remaining after the application of an anti-*Mb* drug, when a single dose (left panels) or 4 doses at interval of 5 days (right panels) are administrated. The following cases are considered: (A) no entrainment. (B) Wee1 acts only on cyclin B/Cdk1. (C) Wee1 acts only on cyclin E/Cdk2. (D) Wee1 acts both on cyclin B/Cdk1 and on cyclin E/Cdk2. To account for the inhibition of cyclin E / Cdk2 by Wee1, Eq. (3) has been modified as described in the legend of Figure S1. The initial number of cells is 100. The drug targets cells with a level of *Mb* larger than 0.95 and the duration of the application of the drug is 0.5h. ZT 0 represents the beginning of the L phase (i.e. start of expression of Wee1).
